# Supplementary material for: Contrasting effects of comorbidities on emergency colon cancer diagnosis: a longitudinal data-linkage study in England
Source: PubMed Central journal article supplement (PMC6521448; doi:10.1186/s12913-019-4075-4), 2019-05-15
Supplement: 12913_2019_4075_MOESM2_ESM.pdf [file 12913_2019_4075_MOESM2_ESM.pdf]

**Table: Prevalence of cancer alarm symptoms in the pre-diagnostic year among comorbid and non-comorbid patients diagnosed with colon cancer following emergency presentation (EP)**

|                                                                            | WOMEN                 |                  |         | MEN                   |                  |         |
|----------------------------------------------------------------------------|-----------------------|------------------|---------|-----------------------|------------------|---------|
|                                                                            | Cancer alarm symptoms | Patients with EP | p-value | Cancer alarm symptoms | Patients with EP | p-value |
|                                                                            | %                     | Total=940        |         | %                     | Total=874        |         |
| <b>Serious non-GI comorbidities recorded in secondary care<sup>o</sup></b> |                       |                  |         |                       |                  |         |
| 0                                                                          | 20.2                  | 618              | 0.899   | 10.6                  | 530              | <0.001  |
| 1+                                                                         | 19.9                  | 322              |         | 20.6                  | 344              |         |
| <b>Gynaecological conditions recorded in primary care<sup>^</sup></b>      |                       |                  |         |                       |                  |         |
| Never                                                                      | 20.2                  | 916              | 0.670   |                       |                  |         |
| New onset/chronic/past                                                     | 16.7                  | 24               |         |                       |                  |         |
| <b>Anxiety/depression recorded in primary care</b>                         |                       |                  |         |                       |                  |         |
| Never                                                                      | 17.9                  | 694              | 0.002   | 12.6                  | 643              | 0.021   |
| New onset pre-diagnostic year                                              | 35.9                  | 53               |         | 22.1                  | 68               |         |
| Chronic/past                                                               | 23.8                  | 193              |         | 19.0                  | 163              |         |
| <b>IBS or diverticular disease recorded in primary care</b>                |                       |                  |         |                       |                  |         |
| Never                                                                      | 18.6                  | 827              | 0.008   | 14.4                  | 832              | 0.884   |
| New onset pre-diagnostic year                                              | 32.1                  | 56               |         | 15.0                  | 20               |         |
| Chronic/past                                                               | 29.8                  | 57               |         | 18.2                  | 22               |         |
| <b>Haemorrhoids recorded in primary care</b>                               |                       |                  |         |                       |                  |         |
| Never                                                                      | 19.9                  | 912              | 0.290   | 14.0                  | 835              | 0.119   |
| New onset pre-diagnostic year                                              | 42.9                  | 7                |         | 30.0                  | 10               |         |
| Chronic/past                                                               | 23.8                  | 21               |         | 24.1                  | 29               |         |
| <b>Other benign GI conditions recorded in primary care<sup>^</sup></b>     |                       |                  |         |                       |                  |         |
| Never                                                                      | 19.8                  | 913              | 0.442   | 14.3                  | 859              | 0.354   |
| New onset pre-diagnostic year                                              | 25.0                  | 4                |         | 20.0                  | 5                |         |
| Chronic/past                                                               | 30.4                  | 23               |         | 30.0                  | 10               |         |
| <b>Hypertension monitoring during the pre-diagnostic year</b>              |                       |                  |         |                       |                  |         |
| No                                                                         | 3.3                   | 510              | <0.001  | 1.0                   | 527              | <0.001  |
| Yes                                                                        | 40.0                  | 430              |         | 35.2                  | 347              |         |

<sup>o</sup>Serious non-gastrointestinal (non-GI) comorbidities include all the comorbidities recorded in secondary care, excluding peptic ulcer, liver disease, inflammatory bowel disease and ulcerative colitis.

<sup>^</sup>Due to sparse data new onset/chronic/past gynaecological conditions have been grouped together. Other benign GI conditions include coeliac disease, gallbladder diseases and others.
